# Supplementary material for: The Reduced Level of Inorganic Polyphosphate Mobilizes Antioxidant and Manganese-Resistance Systems in Saccharomyces cerevisiae
Source: MDPI journal article supplement (doi:10.3390/cells8050461), 2019-05-15
Supplement: s1 [file s1]

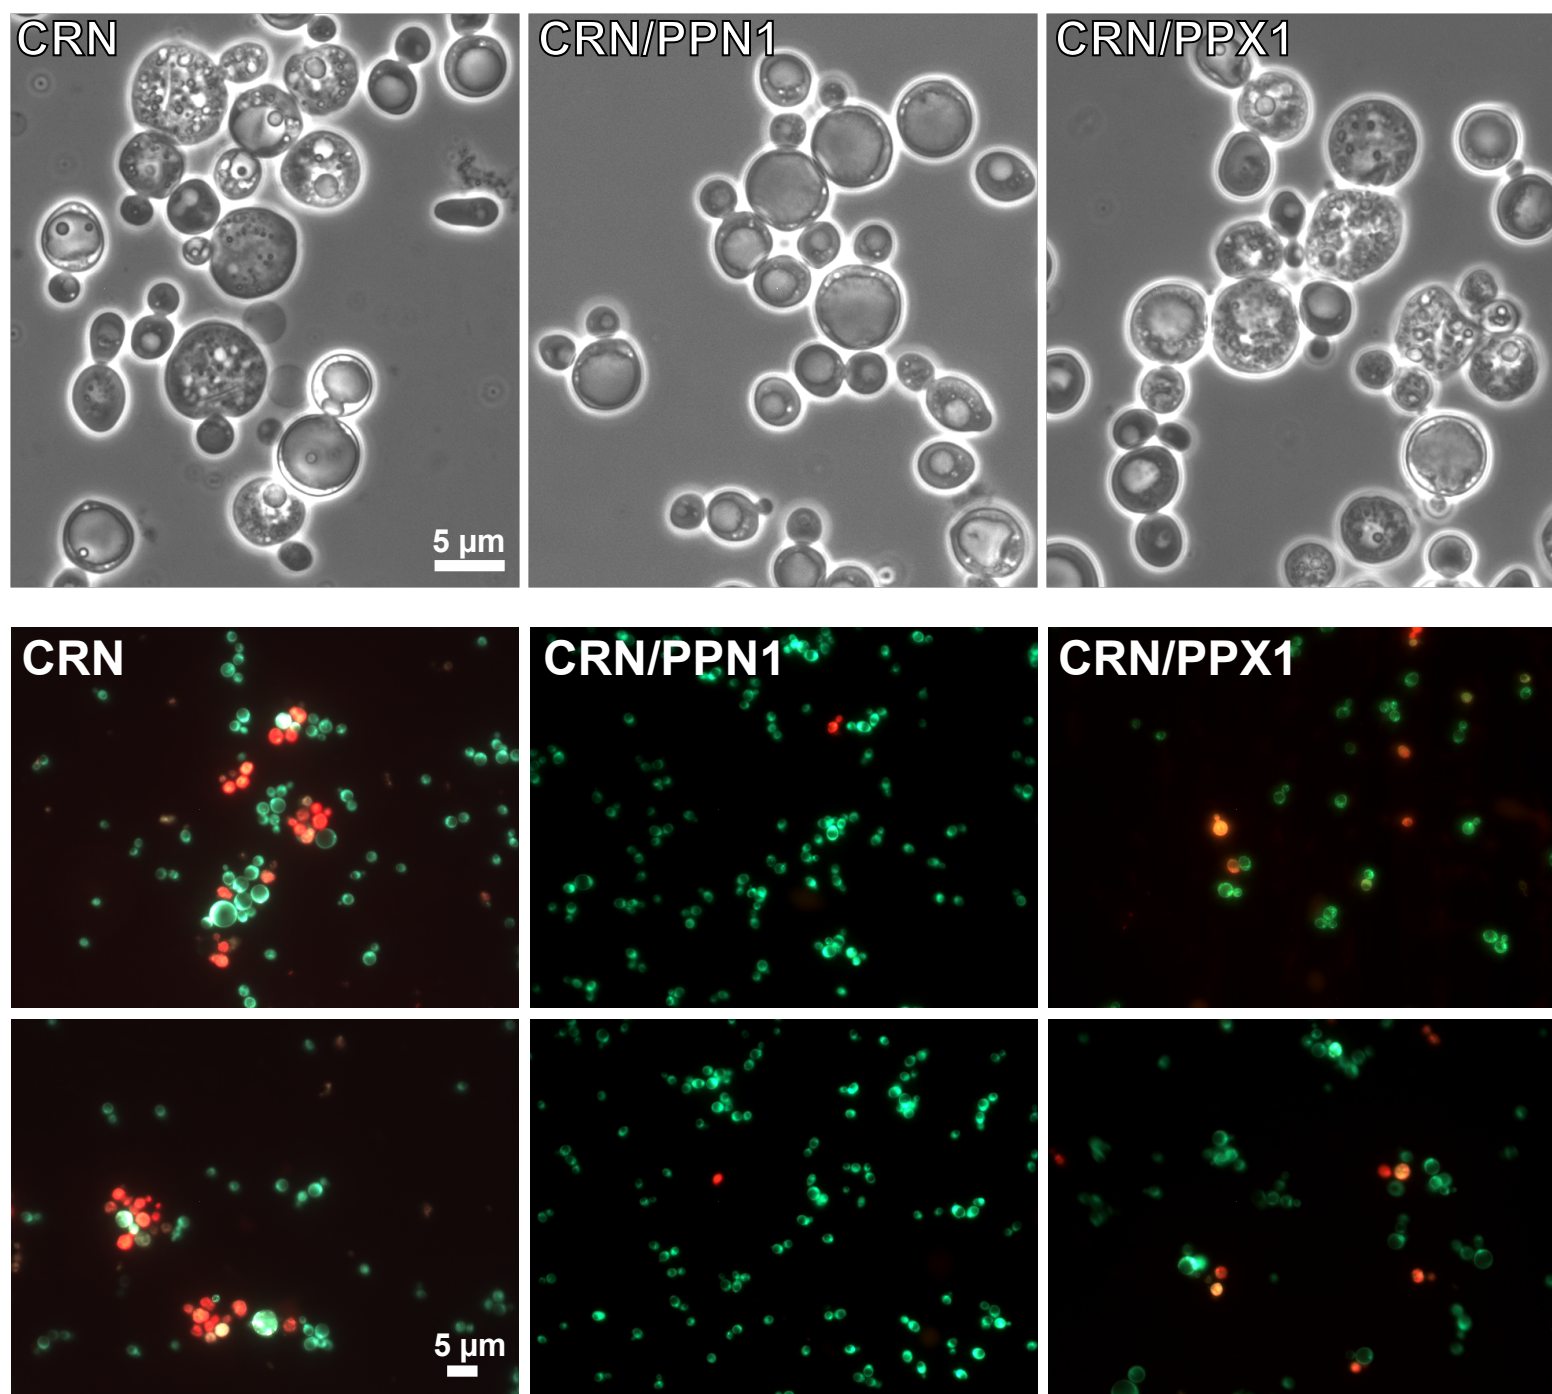

**Figure S1.** The micrographs of *S. cerevisiae* cells cultivated in YPD medium with 5 mM  $\text{MnSO}_4$  for logarithmic growth stage: CRN (40 h of growth), CRN/PPN1 (16 h of growth), and CRN/PPX1 (40 h of growth). Top row – phase contrast, bottom rows – staining with LIVE/DEAD Fungal Light Yeast Viability Kit. Strain names are given in the top row images.
