# Supplementary material for: The Reduced Level of Inorganic Polyphosphate Mobilizes Antioxidant and Manganese-Resistance Systems in Saccharomyces cerevisiae
Source: MDPI journal article supplement (doi:10.3390/cells8050461), 2019-05-15
Supplement: s1 [file s1]

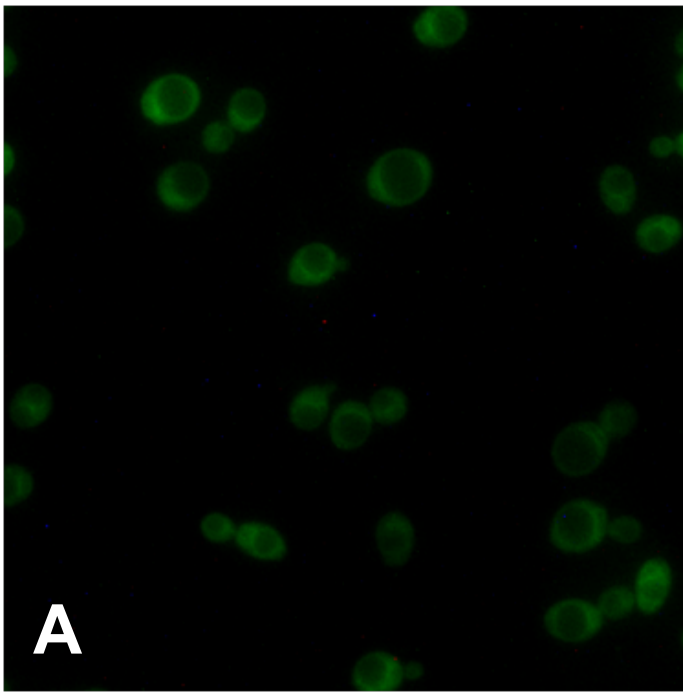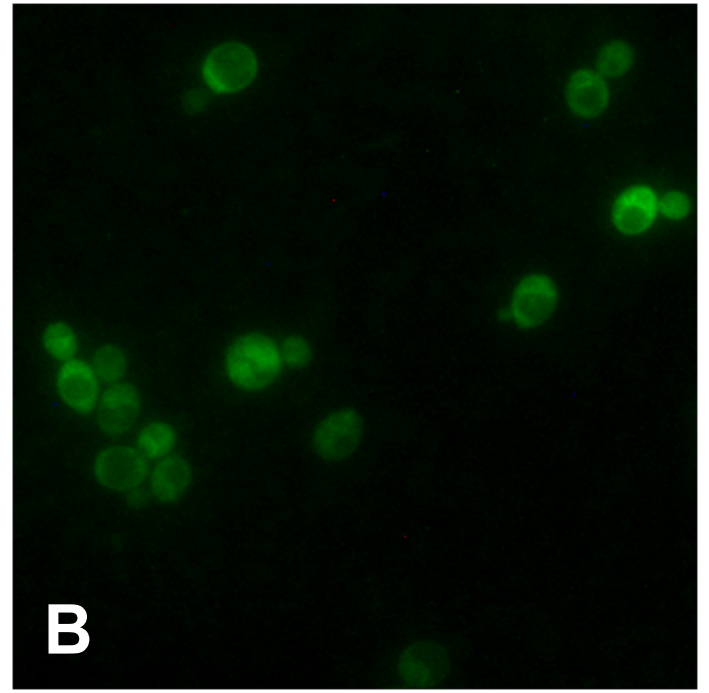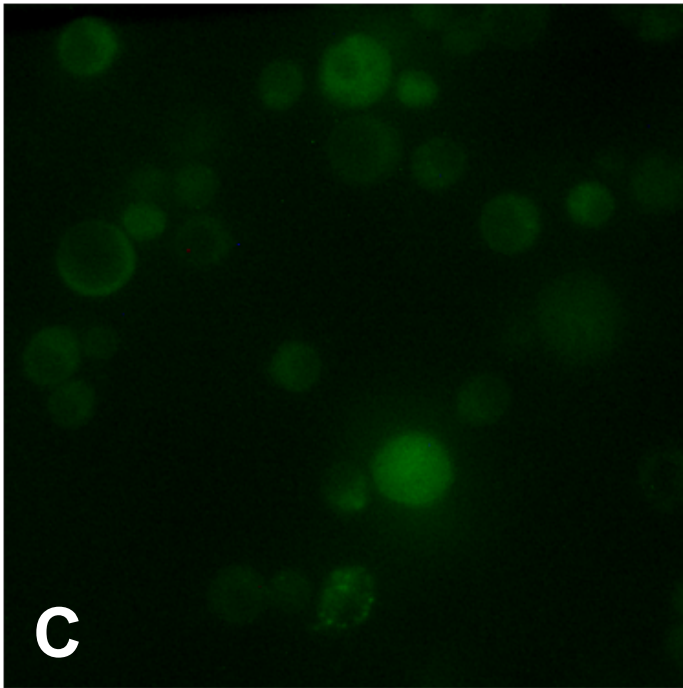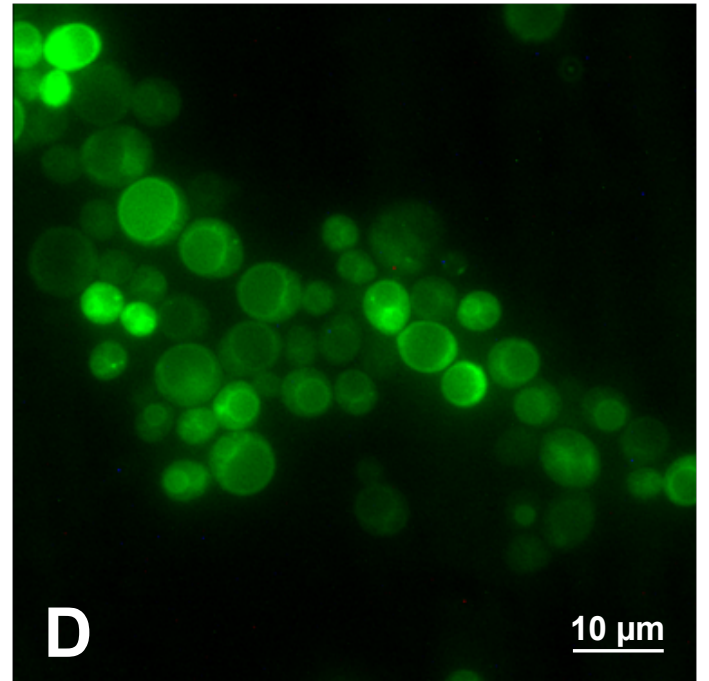

**Figure S2.** The micrographs of the cells of CRN and CRN/PPN1 strains of *Saccharomyces cerevisiae* stained with 1,2,3-dihydrorhodamine. The strains were cultivated in control YPD medium with 14 mM KH<sub>2</sub>PO<sub>4</sub> and in the same medium supplemented with 5 mM MnSO<sub>4</sub> to the logarithmic stage (control - 12 h growth, both strains; 5 mM manganese – 40 h growth, CRN; 16 h growth, CRN/PPN1). (A) – CRN, control YPD; (B) – CRN/PPN1, control YPD; (C) – CRN, manganese excess; (D) – CRN/PPN1, manganese excess.
