# Supplementary material for: The Reduced Level of Inorganic Polyphosphate Mobilizes Antioxidant and Manganese-Resistance Systems in Saccharomyces cerevisiae
Source: MDPI journal article supplement (doi:10.3390/cells8050461), 2019-05-15
Supplement: s1 [file s1]

**Table S1.** The *S. cerevisiae* strains used in the study.

| Strain   | Genotype                                                                      | Polyphosphatase-related features    | Polyphosphatase activity in cell-free extract, U/mg protein (logarithmic phase) | References                                                                                                                                                                                                                                                              |
|----------|-------------------------------------------------------------------------------|-------------------------------------|---------------------------------------------------------------------------------|-------------------------------------------------------------------------------------------------------------------------------------------------------------------------------------------------------------------------------------------------------------------------|
| CRN      | <i>MATa ade2 his3 ura3 ppn1Δ::CgTRP1</i>                                      | PPN1 polyphosphatase null mutant    | 0.54                                                                            | Sethuraman A, Rao NN, Kornberg A. The endopolyphosphatase gene: essential in <i>Saccharomyces cerevisiae</i> , Proc Natl Acad Sci USA 2001; 98:8542–7.                                                                                                                  |
| CRN/PPN1 | <i>MATa ade2 his3 ura3 ppn1Δ::CgTRP1</i> transformed with vector pMB1/PPN1 Sc | PPN1 polyphosphatase overexpression | 4.73                                                                            | Eldarov MA, Baranov MV, Dumina, MV, Shgun AA, et al. (2013) Polyphosphates and exopolyphosphatase activities in the yeast <i>Saccharomyces cerevisiae</i> under overexpression of homologous and heterologous <i>PPN1</i> genes. Biochemistry (Moscow) 2013;78: 946–53. |
| CRN/PPX1 | <i>MATa ade2 his3 ura3 ppn1Δ::CgTRP1</i> transformed with vector pMB1/PPX1 Sc | PPX1 polyphosphatase overexpression | 14.5                                                                            | Lichko LP, Eldarov MA, Dumina MV, Kulakovskaya TV. PPX1 gene overexpression has no influence on polyphosphates in <i>Saccharomyces cerevisiae</i> . Biochemistry (Moscow) 2014;79: 1211–5.                                                                              |

**Table S2.** The Pi and polyP content in *S. cerevisiae* cells grown in control YPD medium (24 h) and in the presence of 5mM MnSO<sub>4</sub> (24 h of growth for CRN/PPN1 strain and 50 h of growth for CRN and CRN/PPX1 strains).

| Strain   | Growth conditions | Mineral phosphorus compounds, $\mu\text{mol P/wet biomass}$ |                    |                      |
|----------|-------------------|-------------------------------------------------------------|--------------------|----------------------|
|          |                   | P <sub>i</sub>                                              | Acid soluble polyP | Acid insoluble polyP |
| CRN      | Control           | 37.9 $\pm$ 1.1                                              | 52.0 $\pm$ 4.8     | 34.4 $\pm$ 1.9       |
|          | +Mn <sup>2+</sup> | 18.6 $\pm$ 0.7                                              | 64.0 $\pm$ 2.5     | 48.5 $\pm$ 1.9       |
| CRN/PPN1 | Control           | 40.8 $\pm$ 0.9                                              | 24.6 $\pm$ 0.5     | 30.7 $\pm$ 2.3       |
|          | +Mn <sup>2+</sup> | 38.0 $\pm$ 4.0                                              | 7.8 $\pm$ 2.8      | 17.4 $\pm$ 0.2       |
| CRN/PPX1 | Control           | 38.0 $\pm$ 0.7                                              | 57.3 $\pm$ 1.0     | 38.2 $\pm$ 1.0       |
|          | +Mn <sup>2+</sup> | 33.5 $\pm$ 5.8                                              | 44.5 $\pm$ 1.5     | 35.3 $\pm$ 1.9       |
